# Supplementary material
Source: HighWire-hosted journal article supplement (https://svn.smart01.highwire.org/content/svn-2024-003418)
Supplement: inline-supplementary-material-1 [file inline-supplementary-material-1.pdf]

## Supplementary Material 1

We conducted manual searches using PubMed to focus on studies published from January 1, 2017, to April 1, 2024. Our primary objective was to examine the incidence, types, and treatment of CPSP in clinical studies and the mechanisms identified in preclinical studies. We used specific terms such as 'central post-stroke pain,' 'pain,' 'thalamus,' 'allodynia,' 'central sensitization,' 'cerebral ischemia,' 'ICH,' 'intracerebral hemorrhage,' 'hyperalgesia,' 'inflammation,' and 'stroke' in the title, abstracts, full text, and all fields to gather essential information about CPSP. Additionally, we included the search terms 'clinical,' 'patients,' and 'treatment' to retrieve clinical studies and added terms like 'animal,' 'model,' 'preclinical,' 'rodent,' 'rat,' and 'mouse' to identify relevant animal studies.
